# Supplementary material
Source: PubMed Central journal article supplement (PMC3198348)
Supplement: 1107303108_pnas.201107303SI.pdf [file 1107303108_pnas.201107303SI.pdf]

# Supporting Information

Choi et al. 10.1073/pnas.1107303108

## SI Materials and Methods

**Immunoblotting.** Protein was extracted using Radio-Immunoprecipitation Assay (RIPA) lysis buffer. Lysates were then separated by SDS/PAGE and transferred to PVDF membranes using standard protocols. Antibodies used are described in Table S5.

**Real-Time Quantitative PCR (qPCR).** RNA was isolated using the RNeasy Mini Kit (Qiagen). Superscript II (Invitrogen) was then used for first-strand cDNA synthesis, and target genes were quantified by SYBR GREEN qPCR. Primers are described in Table S4. Values were normalized to the housekeeping gene Ubc.

**Microarray Analysis.** For gene expression profiling, total RNA was extracted using the Qiagen RNeasy Kit including DNase treatment. Thirty micrograms of total RNA from each specimen and 30  $\mu$ g of Stratagene mouse reference RNA were labeled with Cy5 and Cy3, respectively, and cohybridized to Stanford MEEBO oligonucleotide microarrays according to standard protocols. After overnight hybridization and washing, arrays were imaged using a GenePix 4000B scanner (Axon). Microarray scans were gridded and processed using The Institute for Genomic Re-

search (TIGR) SpotFinder version 3.11. Threshold for spot inclusion was set at background +2 SDs. Channel integrated intensities were normalized using TIGR Midas version 2.19. Spots were filtered with background checking on both channels and signal/noise ratio of 2. Intensities were corrected using local block Lowess normalization, with smoothing parameter of 0.33. SD regularization was also performed within and across arrays. Finally, a low-intensity filter was applied (minimum integrated intensity of 20,000 in both channels). The resulting expression data were converted to log<sub>2</sub> ratios using TIGR MEV, median centered by array, and annotated using SOURCE (1). Processed and raw microarray data have been deposited into the National Center for Biotechnology Information Gene Expression Omnibus database (accession no. GSE 32341). Differentially expressed genes between sample comparison groups were identified using the Rank Product method (2). Probes with false positive rate <10% were selected as significant. For comparison of individual samples, correlation coefficients, scatterplots, and 95% prediction intervals for linear regression were generated using Medcalc version 10.0.

1. Diehn M, et al. (2003) SOURCE: A unified genomic resource of functional annotations, ontologies, and gene expression data. *Nucleic Acids Res* 31:219–223.

2. Breitling R, Armengaud P, Amtmann A, Herzyk P (2004) Rank products: A simple, yet powerful, new method to detect differentially regulated genes in replicated microarray experiments. *FEBS Lett* 573:83–92.

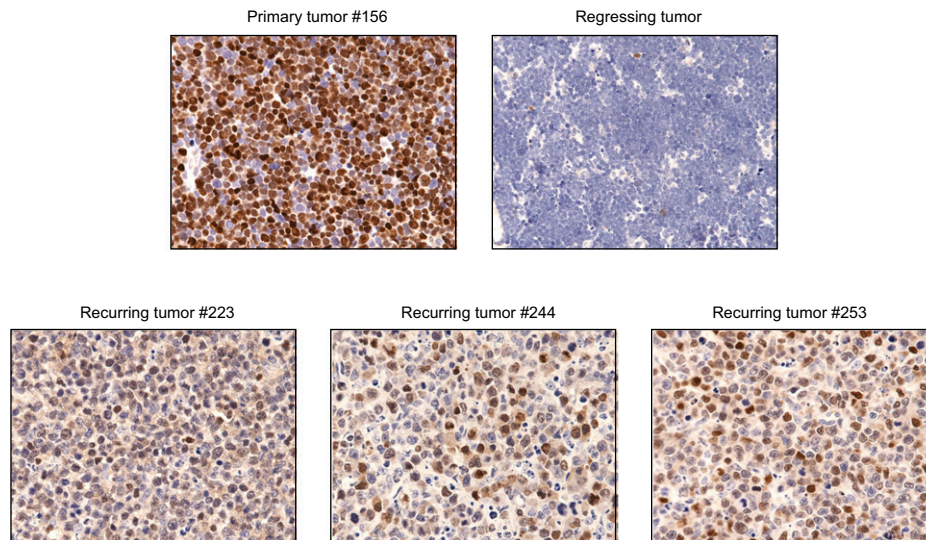

**Fig. S1.** Immunohistochemical staining for MYC in recurring lymphomas. Tissue sections from primary (#156), regressing, and recurring (#223, #244, and #253) lymphomas were stained for MYC (Epitomics) and counterstained with hematoxylin.

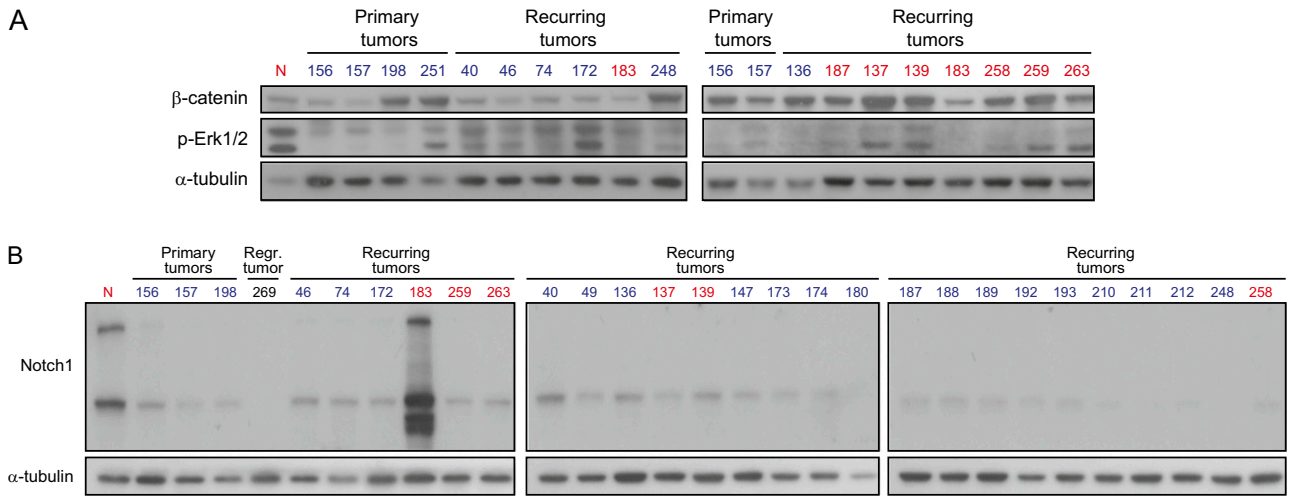

Transgenic MYC expressed  
Endogenous Myc expressed

**Fig. S2.** Status of the Wnt/beta-catenin, RAS/MAPK, and Notch pathways in recurring lymphomas. (A) Western blot analysis for levels of beta-catenin and phospho-Erk1/2 in a panel of primary and recurring lymphomas. (B) Western blot analysis for levels of Notch1 in a panel of primary, regressing, and recurring lymphomas. N, normal thymus control.

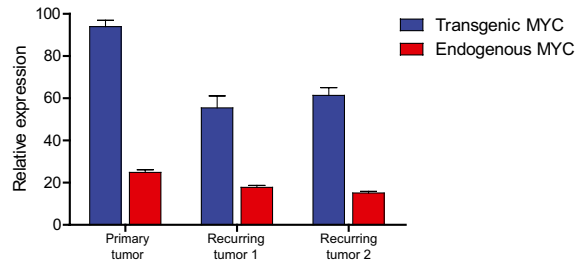

**Fig. S3.** Expression of transgenic and endogenous MYC in primary and recurring lymphoma lines used in MYC-knockdown experiments. Real-time qPCR analysis of transgenic and endogenous MYC expression in a primary lymphoma line and two independently derived recurring lymphoma lines.



**Table S3. Microarray comparison of group II (recurring tumors with transgenic MYC) vs. group III (recurring tumors with endogenous Myc)**

| Twenty-seven genes up-regulated | Five genes down-regulated |
|---------------------------------|---------------------------|
| 1700058J15Rik                   | Dmrtc1a                   |
| Arc                             | Map2k7                    |
| B2m                             | Plunc                     |
| BC016579                        | Schip1                    |
| Cnot1                           | Timm17a                   |
| Cox17                           |                           |
| Cx3cl1                          |                           |
| Edg1                            |                           |
| Eif3s12                         |                           |
| Furin                           |                           |
| Fzd3                            |                           |
| H2-Ob                           |                           |
| Hpcal1                          |                           |
| Idi2                            |                           |
| Kif26b                          |                           |
| Krtap6-1                        |                           |
| Lcp1                            |                           |
| Matr3                           |                           |
| Nit1                            |                           |
| Pcyt1a                          |                           |
| Pik3r1                          |                           |
| Rdh7                            |                           |
| Rxrip110                        |                           |
| Tmcc3                           |                           |
| Trfr2                           |                           |
| Ubc                             |                           |
| Zfp46                           |                           |

**Table S4. Primers used in this work**

| Gene                       | Species | Forward primer (5' to 3') | Reverse primer (5' to 3') |
|----------------------------|---------|---------------------------|---------------------------|
| Primers for RT-qPCR        |         |                           |                           |
| Bax                        | M       | AAGCTGAGCGAGTGTCTC        | CCTTGAGCACCAGTTTGC        |
| Deltex1                    | M       | ATCAGTTCCGGCAAGACACAG     | CGATGAGAGGTCGAGCCAC       |
| Hes1                       | M       | TCAACACGACACCGGACAAAC     | ATGCCGGGAGCTATCTTTCTT     |
| MYC                        | H       | GGTCACACCCTTCTCCCTTC      | AGCAGCTCGGTACCACATC       |
| Myc                        | M       | TCTCCATCCTATGTTGCGGTC     | TCCAAGTAACTCGGTATCATCT    |
| Ncl                        | M       | AGAACCCACATGGCAAAC        | AAGGTCTCTTCAGTGGTATCC     |
| Notch1                     | M       | AACAGTGCCGAATGTGAGTGG     | AAGTGACGCAAGAGCACCTAG     |
| Odc1                       | M       | TGATCCTGATACCTTCGTTTC     | GCTATGATTCTCACTCCAGAG     |
| Ubc                        | M       | AGCCCAGTGTACCACCAAG       | ACCCAAGAACAAGCACAAGG      |
| Primers for PCR/sequencing |         |                           |                           |
| tTA                        | —       | CCTCAGTGGATGTTGCCTTT      | CCTGCACCTGAGGAGTGAAT      |
| Myc exon2                  | —       | CTGAAAGGGGAGTGGTTCAG      | AGGAGGTCCATCCAACCTCT      |
| Myc exon3                  | —       | GTATAGCGTCCGGGATTTCAG     | TGAGGAAAGGAAGTTTGAGGA     |
| Notch1 exon26              | —       | ACGGGAGGACCTAACCACAAAC    | CAGCTTGGTCTCCAACACCT      |
| Notch1 exon27              | —       | CGCTGAGTGCTAAACACTGG      | GTTTTGCCTGCATGTACGTC      |
| Notch1 exon34              | —       | TGAGACTGCCAAAGTGTTC       | CCTGAAGCACTGGAAGGAC       |

**Table S5. Antibodies used in this work**

| Target            | Clone/catalog no. | Company                   |
|-------------------|-------------------|---------------------------|
| Bim               | 2819              | Cell Signaling Technology |
| $\beta$ -Catenin  | 610154            | BD Biosciences            |
| p-Erk1/2          | 4376              | Cell Signaling Technology |
| Human MYC         | 9E10              | Calbiochem                |
| MYC               | C-19              | Santa Cruz Biotechnology  |
| MYC               | 1472-1            | Epitomics                 |
| Notch1            | D1E11             | Cell Signaling Technology |
| p27kip1           | 610241            | BD Biosciences            |
| $\alpha$ -Tubulin | T9026             | Sigma                     |
